## Article

### TITLE

Divergence-based introgression polarization

### AUTHORS

Evan S. Forsythe<sup>1,2\*</sup>, Daniel B. Sloan<sup>1</sup>, and Mark A. Beilstein<sup>2</sup>

### AFFILIATIONS

<sup>1</sup>Department of Biology, Colorado State University, Fort Collins, CO 80523, USA.

<sup>2</sup>School of Plant Sciences, University of Arizona, Tucson, AZ 85721, USA.

### CORRESPONDENCE

Evan. S. Forsythe; 1878 Campus Delivery, Fort Collins, CO 80523; [esfors@rams.colostate.edu](mailto:esfors@rams.colostate.edu)

## 1 **ABSTRACT**

2 Introgressive hybridization results in the transfer of genetic material between species, often with  
3 fitness implications for the recipient species. The development of statistical methods for  
4 detecting the signatures of historical introgression (IG) in whole-genome data has been a major  
5 area of focus. While existing techniques are able to identify the taxa that exchanged genes during  
6 IG using a four-taxon system, most methods do not explicitly distinguish which taxon served as  
7 donor and which as recipient during IG (i.e. polarization of IG directionality). The existing  
8 methods that do polarize IG are only able to do so when there is a fifth taxon available and that  
9 taxon is sister to one of the taxa involved in IG. Here, we present *Divergence-based*  
10 *Introgression Polarization (DIP)*, a method for polarizing IG using patterns of sequence  
11 divergence across whole genomes, which operates in a four-taxon context. Thus, *DIP* can be  
12 applied to infer the directionality of IG when additional taxa are not available. We use  
13 simulations to show that *DIP* can polarize IG and identify potential sources of bias in the  
14 assignment of directionality, and we apply *DIP* to a well-described hominin IG event.

15

## 16 **INTRODUCTION**

17 Hybridization is an influential evolutionary force (Stebbins 1968) that is widespread in  
18 natural populations (Yakimowski and Rieseberg 2014; Mallet et al. 2016). Through backcrossing  
19 to parental populations (Rieseberg and Soltis 1991), hybrids can serve as bridges for the transfer  
20 of alleles and adaptive traits between species or populations (Rieseberg and Soltis 1991;  
21 Dasmahapatra et al. 2012; Suarez-Gonzalez et al. 2016), a process known as introgression (IG)  
22 (Rieseberg and Soltis 1991; Rieseberg et al. 1996; Green et al. 2010; Dasmahapatra et al. 2012;  
23 Mallet et al. 2016). Whole genome sequences and advances in phylogenetic methods (Soltis and  
24 Soltis 2003) have revealed signatures of historical IG in scientifically and economically  
25 important groups, including well-studied examples in Neanderthals and non-African human  
26 populations (Kuhlwilm et al. 2001; Green et al. 2010). Several methods have been developed to  
27 identify taxa that exchanged genes during IG (Huson et al. 2005; Than et al. 2008; Green et al.  
28 2010; Durand et al. 2011; Martin et al. 2015; Pease and Hahn 2015; Stenz et al. 2015;  
29 Rosenzweig et al. 2016). While these methods generally perform well across a variety of  
30 biological and experimental scenarios (Zheng and Janke 2018), theoretical and empirical work  
31 have identified conditions under which each method is susceptible to bias (Eriksson and Manica  
32 2012; Rosenzweig et al. 2016).

33 While there are many tools for detecting IG between taxa, a more challenging aspect of  
34 IG analyses is identifying taxa serving as donors *vs.* recipients of genetic material during IG (i.e.  
35 IG directionality). If hybrids successfully backcross to both parents during IG, alleles will move  
36 in both directions, meaning each parent will serve as donor for some introgressed loci and  
37 recipient for other loci. However, if backcrosses with one parent but not the other are favored by  
38 physiological (Rieseberg and Soltis 1991), selective (Orive and Barton 2002), or biogeographical  
39 (Currat et al. 2008) factors, it can lead to asymmetrical (Barton and Hewitt 1985) movement of  
40 alleles (directional IG, denoted hereafter with ‘ $\Rightarrow$ ’). IG has been shown to underlie the transfer of  
41 adaptive traits to recipient lineages (Whitney et al. 2006; Dasmahapatra et al. 2012; Dannemann  
42 et al. 2016; Figueiró et al. 2017), so the ability to infer the directionality of IG (i.e. polarize IG) is  
43 essential in order to form hypotheses about the functional and adaptive consequences of IG.

44 The majority of tests to detect the occurrence of IG do not explicitly polarize IG (Zheng  
45 and Janke 2018), and those that can only do so in certain cases. For example, the *D* statistic  
46 (Green et al. 2010) is widely-used to infer instances of IG in a four-taxon system. IG polarization  
47 is possible under *D* only when data for a fifth taxon are available (Green et al. 2010; Pease and  
48 Hahn 2015). Moreover, the fifth taxon must be sister to one taxon involved in IG but cannot  
49 itself be involved in IG. Pease and Hahn (2015) define this specific configuration of  
50 introgressing taxa and sister taxa as “intergroup” IG and describe how, when these specific five-  
51 taxon conditions are met, the branching order of introgressed gene trees indicates directionality.  
52 However, the authors also describe how other types of IG (e.g. “ancestral” IG) cannot be  
53 polarized. There are many cases in which a fifth taxon with the required phylogenetic placement  
54 is either not sampled or does not exist (Forsythe et al. In Review). In these cases, it is possible to  
55 statistically identify IG using existing methods but not necessarily to polarize IG. Thus, there is a  
56 need for a more widely applicable statistical method to distinguish between bidirectional and  
57 unidirectional IG, while identifying donor and recipient taxa.

58 Here, we describe and test a method for inferring directionality of IG from genome-scale  
59 data, which we refer to as *Divergence-based Introgression Polarization (DIP)*. *DIP* is based on  
60 the observation that, when IG occurs, it alters not only the level of nucleotide sequence  
61 divergence between the two species exchanging genes (Rosenzweig et al. 2016) but also  
62 divergences with related species that are not directly involved in IG; these changes occur in  
63 systematic and predictable ways according to the directionality of IG (Fig. 1) (Forsythe et al. In  
64 Review; Fontaine et al. 2015; Hibbins and Hahn, In Review). *DIP* is calculated from pairwise

65 sequence divergence between taxa involved in IG and a sister taxon, comparing divergence  
66 values obtained from introgressed loci vs. non-introgressed loci. It takes as input the same types  
67 of data used to infer IG by existing methods (whole genome/chromosome alignments or single-  
68 gene alignments of loci sampled throughout the genome). However, unlike existing methods,  
69 *DIP* can polarize IG when only four taxa are sampled, meaning *DIP* is more widely applicable  
70 than existing methods.

71 We present tools to implement the *DIP* method: <https://github.com/EvanForsythe/DIP>.  
72 We also simulate whole genome alignments in which a subset of loci were introgressed either  
73 unidirectionally, asymmetrically, or symmetrically. We use these simulated genome alignments  
74 to assess how accurately *DIP* polarizes asymmetrical IG and to investigate the effects of  
75 parameters that are known to affect existing IG inference methods, such as proportion of IG and  
76 timing of IG (Durand et al. 2011; Martin et al. 2015; Zheng and Janke 2018). We have recently  
77 used the principles of *DIP* to document asymmetrical IG among Brassicaceae species (Forsythe  
78 et al. In Review), and here, we also apply *DIP* to an empirical data from modern and archaic  
79 hominins.

80

## 81 **NEW APPROACHES**

82 IG can alter levels of sequence divergence between taxa, and these changes can differ depending  
83 on the directionality of IG (Forsythe et al. In Review; Hibbins and Hahn, In Review) (Fig. 1). To  
84 define the properties of a divergence-based IG test, we use hypothetical species  $P1$ ,  $P2$ ,  $P3$  and  
85 an outgroup,  $O$ . Species  $P1$  and  $P2$  are sister within the species tree, and we model IG between  
86 species  $P2$  and  $P3$ . We denote the timing of the three successive speciation events among these  
87 taxa as  $T_\gamma$ ,  $T_\beta$ , and  $T_\alpha$  and the timing of the IG event between  $P2$  and  $P3$  as  $T_{IG}$  (Fig. 1A). When  
88 introgression has occurred between  $P2$  and  $P3$ , some loci will reflect a history of IG, while other  
89 loci will reflect a history of speciation. In applying *DIP*, a gene tree is inferred for each locus,  
90 and the resulting topology is used to distinguish introgressed loci (IG loci) from speciation loci  
91 (SP loci). For all loci, we quantify pairwise sequence divergence values between  $P2$  and  $P3$   
92 ( $K_{23}$ ), between  $P1$  and  $P2$  ( $K_{12}$ ), and between  $P1$  and  $P3$  ( $K_{13}$ ) (Fig. 1). The values of  $K_{23}$ ,  $K_{12}$ ,  
93 and  $K_{13}$  on a given gene tree are expected to correspond to  $T_{IG}$ ,  $T_\alpha$ , and  $T_\beta$  in a way that depends  
94 on the IG history of that gene. IG in either direction is expected to reduce  $K_{23}$  relative to genes  
95 that reflect the species tree, as the divergence time between the sequences of these taxa is  
96 reduced from  $T_\beta$  to  $T_{IG}$  (Fig. 1). In contrast, IG can cause  $K_{12}$  to increase corresponding to a

97 change in divergence time from  $T_\alpha$  to  $T_\beta$  but only if IG occurred from  $P3$  to  $P2$  (Fig. 1B). IG in  
98 the other direction should not affect  $K_{12}$ . The effects on  $K_{13}$  are also sensitive to the direction of  
99 IG. If it occurs from  $P2$  to  $P3$ , IG should decrease  $K_{13}$  based on a change in divergence time  
100 from  $T_\beta$  to  $T_\alpha$  (Fig. 1C), but there should be no effect on  $K_{13}$  if IG occurs in the other direction.  
101 To quantify these effects, differences are calculated between the mean values of  $K_{23}$ ,  $K_{12}$ , and  $K_{13}$   
102 from all SP loci and the mean values of the same corresponding divergence measurements from  
103 all IG loci in the following fashion:

104

105 *Eq. 1:*

$$106 \quad \Delta K_{23} = \bar{K}_{23}(SP \text{ loci}) - \bar{K}_{23}(IG \text{ loci})$$

107

108 *Eq. 2:*

$$109 \quad \Delta K_{12} = \bar{K}_{12}(IG \text{ loci}) - \bar{K}_{12}(SP \text{ loci})$$

110

111 *Eq. 3:*

$$112 \quad \Delta K_{13} = \bar{K}_{13}(SP \text{ loci}) - \bar{K}_{13}(IG \text{ loci})$$

113

114 Note that the order of subtraction used in defining these terms is not always the same with  
115 respect to SP and IG loci and was chosen such that the effects of relevant IG are expected to  
116 yield positive (rather than negative)  $\Delta K$  in each case. Together, this set of  $\Delta K$  values composes  
117 the divergence profile of *DIP*. Below we show the relative magnitudes of these values can be  
118 used differentiate evolutionary histories based on the polarity of IG. We also use coalescent-  
119 based simulations to identify biases that can be introduced by other sources of genealogical  
120 discordance such as incomplete lineage sorting (ILS), and we devise additional layers of *DIP*  
121 comparisons that can be used to partially alleviate these biases.

122

## 123 **RESULTS**

### 124 *DIP: Distinguishing modes of unidirectional and bidirectional introgression*

125 The simplest application of *DIP* is related to the approach we recently applied in analyzing IG  
126 among Brassicaceae species (Forsythe et al. In Review). It involves testing whether  $\Delta K_{23}$ ,  $\Delta K_{12}$ ,  
127 and  $\Delta K_{13}$  are significantly greater than zero and compares these results to the expectations for  $\Delta K$   
128 under different IG scenarios (Fig. 2). If IG has occurred in both directions between  $P2$  and  $P3$ ,

129 then all three  $\Delta K$  values should be positive. However, as noted above, if IG has occurred  
130 exclusively in one direction, the expectation for either  $\Delta K_{12}$  or  $\Delta K_{13}$  should remain zero (Fig. 2).  
131 To test the performance of *DIP*, we simulated whole-genome alignments under unidirectional IG  
132 in each direction, as well as under symmetric bidirectional IG (see Methods and Fig. S1). We  
133 applied *DIP* to each simulated genome. For the genome simulated under unidirectional  $P2 \Rightarrow P3$   
134 IG, we observed  $\Delta K_{23} > 0$ ,  $\Delta K_{12} = 0$ , and  $\Delta K_{13} > 0$  (Fig. 3A), which is the expected pattern for  
135 that direction of IG (Fig. 1). For the genome simulated under symmetric bidirectional IG, we  
136 observed  $\Delta K_{23} > 0$ ,  $\Delta K_{12} > 0$ , and  $\Delta K_{13} > 0$  (Fig. 3B), which is the expected pattern if some IG is  
137 occurring in both directions. For the genome simulated under unidirectional  $P3 \Rightarrow P2$  IG, we  
138 observed  $\Delta K_{23} > 0$ ,  $\Delta K_{12} > 0$ , and  $\Delta K_{13} = 0$  (Fig. 3C), again reflecting our expected *DIP* profile  
139 for that direction. These results indicate that *DIP* can correctly classify all three types of IG  
140 under these simulated conditions.

141 Next, we explored the performance of *DIP* across a range of different parameter settings,  
142 including the proportions of genes in the genome that had been subject to IG ( $pIG$ ). We also  
143 varied the proportions of IG loci that moved in one direction or the other [ $p(P3 \Rightarrow P2)$ ]. We  
144 performed a parameter scan (Fig. S1) by generating simulated genomes with different values of  
145  $pIG$  and  $p(P3 \Rightarrow P2)$  and applying *DIP* to each genome (Fig. 3D). We found the expected  $P3 \Rightarrow P2$   
146 *DIP* profile for the majority of replicated genomes generated with  $p(P3 \Rightarrow P2)=1$  (i.e.  
147 unidirectional  $P3 \Rightarrow P2$  IG) (Fig. 3D, red boxes). Further, we found the expected  $P2 \Rightarrow P3$  *DIP*  
148 profile for the majority of replicated genomes generated with  $p(P3 \Rightarrow P2)=0$  (i.e. unidirectional  
149  $P2 \Rightarrow P3$  IG) (Fig. 3D, gray boxes). Intermediate  $p(P3 \Rightarrow P2)$  values all yielded the expected *DIP*  
150 profile for bidirectional IG for all replicates (Fig. 3D, white boxes).

### 151 152 *Double-DIP: Detecting asymmetry in cases of bidirectional introgression*

153 Existing IG polarization methods tend to assume unidirectionality of IG, but it is also important  
154 to consider the possibility of asymmetric bidirectional IG that falls short of being strictly  
155 unidirectional [discussed in (Martin et al. 2015)]. The basic implementation of *DIP* described  
156 above can detect the presence of bidirectional IG (see Fig. 3B profile and Fig. 3D white boxes),  
157 but it does not report directional asymmetry (i.e. whether either of the two directions  
158 predominates) at intermediate values of  $p(P3 \Rightarrow P2)$ . Hereafter, we refer to this basic  
159 implementation of *DIP* as *Single-DIP* or  $1 \times DIP$ . To more directly test for asymmetry in cases of  
160 bidirectional IG, we developed an additional step in the *DIP* analysis, which we refer to as

161 Double-*DIP* or  $2\times DIP$ . The premise of  $2\times DIP$  is that  $\Delta K_{12}$  for loci introgressed  $P3\Rightarrow P2$  and  $\Delta K_{13}$   
162 for loci introgressed  $P2\Rightarrow P3$  have the same expected values, as they are both based on a shift in  
163 divergence time between  $T_\beta$  and  $T_\alpha$  (Fig. 1). Therefore, under symmetric bidirectional ( $P3\leftrightarrow P2$ )  
164 IG, we expect genome-wide values of  $\Delta K_{12}$  and  $\Delta K_{13}$  to equal each other. Alternatively, if  
165  $P3\Rightarrow P2$  IG exceeds  $P2\Rightarrow P3$  IG, we expect genome-wide  $\Delta K_{12} > \Delta K_{13}$ .  $2\times DIP$  compares the  
166 magnitudes of  $\Delta K_{12}$  and  $\Delta K_{13}$  by formulating a simple summary statistic,  $\Delta\Delta K$ , which is defined  
167 as follows:

168

169 Eq. 4:

$$170 \quad \Delta\Delta K = \Delta K_{12} - \Delta K_{13}$$

171

172 The expectation for the  $\Delta\Delta K$  summary statistic is zero under symmetric bidirectional IG, positive  
173 under IG that is biased towards  $P2$ , and negative under IG that is biased towards  $P3$  (Fig. 4).

174 We explored the performance of  $2\times DIP$  by simulating genomes in the same manner as  
175 described above for  $1\times DIP$ . For the genome simulated under unidirectional  $P2\Rightarrow P3$  IG  
176 ( $p(P3\Rightarrow P2) = 0$ ), we observed a significantly negative  $\Delta\Delta K$  (Fig. 5A,  $p < 0.0002$ ), consistent  
177 with our expectations. For the genome simulated under symmetric bidirectional IG,  $\Delta\Delta K$  did not  
178 significantly differ from zero (Fig. 5B,  $p = 0.914$ ), also consistent with expectations. For the  
179 genome simulated under unidirectional  $P3\Rightarrow P2$  IG ( $p(P3\Rightarrow P2) = 1$ ), we observed significantly  
180 positive  $\Delta\Delta K$  (Fig. 5C,  $p < 0.0002$ ), again reflecting expectations. These results indicate that  
181  $2\times DIP$  correctly classified all three types of IG. As above, we also performed a parameter scan to  
182 explore  $2\times DIP$ . We found that genomes simulated with  $p(P3\Rightarrow P2) = 0.5$  (i.e. symmetric  
183 bidirectional IG) returned  $\Delta\Delta K$  value that did not significantly differ from zero (Fig. 5D, white  
184 boxes). We also found significant  $\Delta\Delta K < 0$  for nearly all replicated genomes simulated with  
185  $p(P3\Rightarrow P2) < 0.5$  and significant  $\Delta\Delta K > 0$  for nearly all replicated genomes simulated with  
186  $p(P3\Rightarrow P2) > 0.5$  (Fig. 5D). The only exception to these patterns were found at  $pIG \leq 0.1$  during  
187 nearly symmetrical IG ( $p(P3\Rightarrow P2) = 0.45$  and  $0.55$ ). Taken together, these results indicate that  
188  $2\times DIP$  correctly inferred asymmetrical IG, even in cases in which there is only slight asymmetry,  
189 meaning it is a sensitive method for polarizing asymmetrical IG that is robust across a wide  
190 variety of parameter values.

191

192 *Robustness of DIP to population divergence time*

193 The task of assigning gene trees as IG vs. SP based on gene tree topology is an integral part of  
194 *DIP*; however, this task comes with challenges. Phylogenetic methods rely on diagnostic  
195 synapomorphies to infer gene tree topologies; scarcity of synapomorphies in an alignment leads  
196 to phylogenetic error and inaccurate gene tree assignment. Another confounding factor is ILS,  
197 which can result in gene trees that reconstruct the history of deep coalescence, as opposed to the  
198 underlying history of SP/IG. ILS can result in introgressed loci displaying the SP topology and  
199 vice versa. Importantly, ILS is also expected to yield gene trees displaying an alternative third  
200 topology (Green et al. 2010) (see Triple-*DIP* below). Both mis-assignment and ILS are more  
201 pronounced during rapid divergence (i.e. short internal branches) and can be investigated with  
202 coalescent simulations (Degnan and Rosenberg 2009; Degnan and Rosenberg 2013). Moreover,  
203 it has been shown that, because  $P3 \Rightarrow P2$  IG trees have longer internal branch lengths than  $P2 \Rightarrow P3$   
204 IG trees, the latter are more prone to both mis-assignment and ILS (Zheng and Janke 2018). This  
205 feature introduces the potential for directional bias in *DIP*. Therefore, we explored divergence  
206 times, as an additional parameter that may influence performance.

207 All previous simulations were implemented with constant and large divergence times (see  
208 Fig. 1). To explore the branch length parameter, we modified divergence times by multiplying all  
209 of the branch lengths by a scaling factor (SF) (see Methods), essentially modifying the height of  
210 the entire tree used for simulations. SFs greater than one yield taller trees, while SFs less than  
211 one yield shorter trees. For each SF, we simulated ten replicate genomes and calculated  $\Delta\Delta K$  for  
212 each replicate. We first classified SP and IG loci based on the known history used to simulate the  
213 data and plotted the resulting  $\Delta\Delta K$  values (omniscient  $2 \times DIP$ ). We found that  $2 \times DIP$  correctly  
214 inferred asymmetry (or lack thereof) at all branch lengths and that the magnitude of  $\Delta\Delta K$  was  
215 proportional to the SF (Fig. 6A, D and G). However, when working with real datasets it is rare to  
216 know if individual loci with IG topologies are the result of bona fide IG, as opposed to ILS or  
217 errors in phylogenetic inference. To explore the impact of the SF on the ability of  $2 \times DIP$  to  
218 distinguish between signature from bona fide IG loci and those mis-assigned due to ILS or  
219 phylogenetic error, we calculated  $\Delta\Delta K$  using topology-based (non-omniscient) assignment. With  
220 this approach, we observed an upward bias in  $\Delta\Delta K$  at low SFs (Fig. 6B, E, and H). This bias  
221 favors inference of  $P3 \Rightarrow P2$  IG even when there is asymmetry in the opposite direction (Fig. 6E).  
222 As expected, this bias exists at the SFs for which mis-assignment of gene trees is most



223 pronounced (Fig. S2), suggesting that it results from gene tree mis-assignment and/or ILS (see  
224 Discussion).

225

226 *Triple-DIP: Adjusting for gene tree assignment bias*

227 To address the directional bias in  $2\times DIP$  caused by gene tree mis-assignment/ILS at short branch  
228 lengths, we developed an additional layer that can be applied in  $DIP$  analysis, which we refer to  
229 as Triple- $DIP$  or  $3\times DIP$ , so named because it includes an additional  $\Delta$  component (i.e. the “delta  
230 of the delta of the delta”). Briefly, in addition to calculating the standard  $2\times DIP$  as above, we  
231 also calculate an alternative  $\Delta\Delta K$  ( $\Delta\Delta K_{alt}$ ) that substitutes gene trees with the alternative  
232 topology,  $((P1, P3), P2)$ , for the IG loci used in the standard  $\Delta\Delta K$ :

233

234 *Eq. 5*

$$235 \quad \Delta\Delta K_{alt} = \left( \bar{K}_{12}(ALT \text{ loci}) - \bar{K}_{12}(SP \text{ loci}) \right) - \left( \bar{K}_{13}(SP \text{ loci}) - \bar{K}_{13}(ALT \text{ loci}) \right)$$

236

237 Because  $P2$  and  $P3$  are the two taxa subject to IG, loci with this alternative topology should arise  
238 only from mis-assignment/ILS and not true IG. Following the logic of standard  $D$  statistics  
239 (Green et al. 2010; Durand et al. 2011), we reasoned that mis-assignment/ILS should be equally  
240 likely to produce each of the two topologies that conflict with the species tree. Therefore, this  
241 alternative  $2\times DIP$  calculation may provide a measure of the amount of bias that is introduced by  
242 these processes. In applying  $3\times DIP$ , we weight this value by the relative frequencies of the loci  
243 with the expected ( $P3 \Leftrightarrow P2$ ) IG topology (IG loci) and the alternative topology (ALT loci). The  
244  $\Delta\Delta\Delta K$  summary statistic is calculated as follows:

245

246 *Eq. 6*

$$247 \quad \Delta\Delta\Delta K = \Delta\Delta K - \left( \frac{\# \text{ ALT loci}}{\# \text{ IG loci}} \times \Delta\Delta K_{alt} \right)$$

248

249 It should be noted that calculation of a  $3\times DIP$  correction is only possible when there is at  
250 least some mis-assignment/ILS because it relies on the presence of  $((P1, P3), P2)$  loci. As such,  
251 when we applied  $3\times DIP$  to genomes simulated with different branch lengths, we were only able

252 to consistently obtain measurements under short-branch conditions ( $SF < 1.0$ ) where ILS is  
253 prevalent (Fig. 6C, F, and I), because these were the only conditions that returned some loci with  
254 the relevant topology. Under these short-branch conditions, we found that  $3 \times DIP$  reduced but did  
255 not eliminate the bias observed in  $2 \times DIP$ . While  $\Delta\Delta\Delta K$  was still erroneously positive for the  
256 lowest branch length values (Fig. 6F and I), the magnitude of  $\Delta\Delta\Delta K$  was less than that of  $\Delta\Delta K$ .

257 We further explored bias in  $2 \times DIP$  and  $3 \times DIP$  by simulating short branch trees (with SF  
258 of 0.1, 0.2, and 0.3) across a range of  $p(P3 \Rightarrow P2)$  values. We first applied omniscient  $2 \times DIP$  to  
259 give context to the bias introduced during assignment. As expected, omniscient  $2 \times DIP$  yielded  
260 negative  $\Delta\Delta K$  values for all replicates in which  $p(P3 \Rightarrow P2) < 0.5$  (Fig. 7A). Consistent with the  
261 bias observed in Fig. 6, standard (non-omniscient)  $2 \times DIP$  yielded erroneously positive  $\Delta\Delta K$   
262 values, especially for the shortest branch length conditions (Fig. 7B).  $3 \times DIP$  reduced the bias,  
263 only yielding erroneously positive  $\Delta\Delta\Delta K$  values for the highest  $p(P3 \Rightarrow P2)$  values and the  
264 shortest branch length conditions (Fig. 7C). We also tested the performance of  $DIP$  in a situation  
265 in which ILS has occurred but not IG ( $pIG=0$ ;  $SF=0.1$ ) (Fig. S3). Despite the lack of true IG in  
266 these simulations,  $1 \times DIP$  produced a profile consistent with  $P3 \Rightarrow P2$  IG (Fig. S3B), although the  
267 relative positions of  $\Delta K_{23}$ ,  $\Delta K_{12}$ , and  $\Delta K_{13}$  distributions differed from the pattern in Fig. 3C.  
268  $2 \times DIP$  also significantly indicated  $P3 \Rightarrow P2$  IG (Fig. S3C), but  $3 \times DIP$  produced a  $\Delta\Delta\Delta K$  that was  
269 not significantly different than zero, again indicating that  $3 \times DIP$  is less prone to falsely  
270 indicating  $P3 \Rightarrow P2$  IG. Together, these results indicate that  $3 \times DIP$  is the most robust of the three  
271 tests.

## 272

### 273 *Analysis of hominin IG*

274 To understand the performance of  $DIP$  on empirical data, we applied  $DIP$  to existing genomic  
275 data. We focused on IG that occurred between Neanderthal and a modern human European  
276 lineage (Green et al. 2010; Prüfer et al. 2014). Using a five-taxon application of the  $D$ -statistic  
277 that made use of the phylogenetic position of multiple modern African populations, a previous  
278 study (Green et al. 2010) determined that unidirectional IG occurred Neanderthal  $\Rightarrow$  European  
279 lineages. We applied  $DIP$  to chromosome one from a Neanderthal sample, a Denisovan sample,  
280 two modern human (San [African] and French [European]) samples, and the chimpanzee  
281 reference genome. The availability of a Denisovan sample allowed us to infer  $DIP$  in two  
282 different ways using two different taxon sampling schemes (TSS1 and TSS2) (Fig. 8A and F).

283 For both TSSs, there were three gene tree topologies present (Fig. 8B and I), indicating the  
284 possibility of mis-assignment due to phylogenetic error and ILS.

285 Using TSS1,  $1 \times DIP$  yielded a profile indicating the presence of at least some  
286 bidirectional IG (Fig. 8C), a scenario which was not ruled out by (Green et al. 2010). However, it  
287 should be noted that, while  $\Delta K_{12}$ ,  $\Delta K_{13}$  were both significantly positive, the  $\Delta K_{13}$  was much  
288 closer to zero, which would indicate a substantial asymmetry towards Neanderthal  $\Rightarrow$  French IG.  
289  $2 \times DIP$  and  $3 \times DIP$  indicated significantly positive  $\Delta \Delta K$  and  $\Delta \Delta \Delta K$ , respectively (Fig. 8D and E),  
290 consistent with asymmetric IG in the Neanderthal  $\Rightarrow$  French direction. However, when we applied  
291  $DIP$  to TSS2, we saw contradictory results. While,  $1 \times DIP$  again indicated the presence of  
292 bidirectional IG, although without the near-zero  $\Delta K_{13}$  (Fig. 8H),  $2 \times DIP$  and  $3 \times DIP$  yielded  
293 positive  $\Delta \Delta K$  and  $\Delta \Delta \Delta K$ , respectively (Fig. 8I and J).  $2 \times DIP$  and  $3 \times DIP$  from TSS2 would  
294 indicate French  $\Rightarrow$  Neanderthal IG. While IG from modern humans has been inferred in other  
295 Neanderthal samples (Kuhlwilm et al. 2016), it is at odds with findings from TSS1 and Green et  
296 al. (2010).

297 To understand this discrepancy and put our empirical analyses in the context of our  
298 simulations, we plotted distributions of divergence estimates ( $K_{23}$ ,  $K_{12}$ ,  $K_{13}$ ) calculated from two  
299 simulated genomes and the TSSs used for the empirical analysis. The empirical distributions  
300 display a wider spread than the simulated distributions, potentially introducing noise into the  
301 empirical analysis. Importantly, empirical data also show reduced levels of divergence, even  
302 compared to the dataset simulated with the shortest branch lengths (SF = 0.1). This suggests that  
303 the biasing factors explored above could be even more at-play in the hominin analysis (see  
304 Discussion).

305

## 306 **DISCUSSION**

307

### 308 *Intended applications of DIP*

309 Our simulation analyses provide a proof-of-principle that divergence data can be used to polarize  
310 IG in a four-taxon context, narrowing the methodological gap between our ability to identify IG  
311 and our ability to determine the direction of gene transfer. It should be noted that  $DIP$  is not  
312 designed to replace existing methods and act as a frontline test of whether IG has occurred.  
313 Instead, we recommend cases of IG first be confidently identified with existing tools (Huson et  
314 al. 2005; Than et al. 2008; Green et al. 2010; Durand et al. 2011; Martin et al. 2015; Pease and

315 Hahn 2015; Stenz et al. 2015; Rosenzweig et al. 2016). In these cases, *DIP* can then be used to  
316 polarize the direction of IG, a critical step toward interpreting the biological implications of IG.  
317 As we have shown above, *DIP* has the potential to distinguish unidirectional and bidirectional IG  
318 and, in cases of bidirectionality, to test for asymmetry between the two directions.

319 While there are population genetic (Schridder et al. 2018) and five-taxon phylogenetic  
320 (Green et al. 2010; Pease and Hahn 2015) methods capable of polarizing IG, *DIP* offers the  
321 ability to detect asymmetric IG in both directions using a four-taxon context. This will be  
322 valuable because very little is known about the extent of reciprocal exchange that occurred  
323 during even well-studied IG events (Green et al. 2010; Kuhlwilm et al. 2016), a deficit that likely  
324 stems from an absence of sensitive tools. Another group (Hibbins and Hahn, In Review) has  
325 recently proposed an approach that overlaps with *DIP*. They introduce a statistic,  $D_2$ , which is  
326 conceptually similar to  $\Delta K_{13}$  described here. As such, non-zero values of  $D_2$  indicate the presence  
327 of  $P2 \Rightarrow P3$  IG (B  $\Rightarrow$  C by their nomenclature). *DIP* goes further than this approach because it  
328 also uses  $\Delta K_{12}$  to test for IG in the opposite direction and  $\Delta \Delta K$  to determine the predominant  
329 direction of IG. The primary focus of the recent work by Hibbins and Hahn (In Review), is the  
330 development of another statistic,  $D_1$ , that assesses the timing of introgression relative to  
331 speciation events and can be used in assessing possible cases of homoploid hybrid speciation.  
332 This is an elegant application of the same type of divergence-based logic that underlies *DIP* to a  
333 biological question that cannot currently be addressed with our method. We suggest that further  
334 improvements in polarizing IG can be made by combining the explicit coalescent-based  
335 modeling of Hibbins and Hahn with the more comprehensive summary provided by  $1\times$ ,  $2\times$ , and  
336  $3\times$  *DIP*.

337  
338 *Bias in DIP*

339 It should be noted that the simulation branch length parameters used in Fig. 3 and Fig. 5 resulted  
340 in gene trees with relatively deep divergences. These branch lengths were chosen because they  
341 emphasize differences in divergence and minimize potential biasing factors, thus providing the  
342 clearest view of the general properties of *DIP*. However, it has been shown that timing of  
343 population divergence is an extremely influential parameter in IG analyses (Durand et al. 2011;  
344 Martin et al. 2015; Zheng and Janke 2018). This is true, in part, because the length of internal  
345 branches is directly related to the extent of ILS that occurs (Maddison and Knowles 2006). Short  
346 branches lead to increased ILS (Degnan and Rosenberg 2013), which can mimic IG and

347 introduce noise into IG analyses. Coalescent simulations, such as those that we performed,  
348 capture this phenomenon (Hudson 2002; Degnan and Rosenberg 2009), introducing discordant  
349 gene trees at a rate dependent on branch length parameters.

350 Population divergence is additionally important for *DIP* for a more intuitive reason; the  
351 magnitude of the  $\Delta K$  measurements, which are the cornerstone of *DIP*, are directly proportional  
352 to the length of internal branches, meaning that *DIP* gains power to differentiate between  
353 alternative hypotheses as branches are lengthened. Finally, there is a disparity in the accuracy of  
354 topology assignment for loci introgressed  $P3 \Rightarrow P2$  vs. the opposite direction (Zheng and Janke  
355 2018). This disparity stems from the fact that the internal branch on  $P2 \Rightarrow P3$  IG gene trees are  
356 shorter than the same branch on  $P3 \Rightarrow P2$  IG gene trees, making for fewer diagnostic  
357 synapomorphies by which to infer the IG topology. This disparity is most pronounced under  
358 conditions in which phylogenetically informative synapomorphies are scarce (i.e. short branch  
359 lengths). The specific disparity between genes introgressed in each direction is especially  
360 problematic for *DIP* because it is likely to introduce a directional bias, favoring inference of  
361  $P3 \Rightarrow P2$  IG. All of the above properties lead to challenges at the stage of assigning loci as SP vs.  
362 IG loci.

363 For the above reasons, we performed parameter scans to explore the influence of branch  
364 length. We found that  $2 \times DIP$  performs as expected when the assignment step is bypassed in  
365 omniscient mode (Fig 6A, D and G) but bias at short branch lengths arises when SP and IG loci  
366 must be classified directly based on the data (Fig. 6B, E, and H). Thus, directional bias arises  
367 from error at the assignment stage. Of course, when working with empirical datasets,  
368 omniscience about origins and the effects of IG vs. ILS on individual loci is not possible. As  
369 such, assignment error may be unavoidable, so we sought to develop a strategy to correct for bias  
370 that arises from mis-assignment, leading to the development of  $3 \times DIP$ . A benefit of  $3 \times DIP$  is  
371 that it is applicable under the conditions in which bias is most pronounced. Following the logic  
372 of the *D*-statistic (Green et al. 2010),  $3 \times DIP$  is based on the expectation that ILS is equally likely  
373 to produce the two topologies that conflict with the species tree:  $(P1(P2,P3))$  and  $(P2(P1,P3))$ .  
374 Therefore, under the assumption that there has been no IG between  $P3$  and  $P1$ , the number of  
375 “ALT loci”, which are defined by having the  $(P2(P1,P3))$  topology, provides an estimate for the  
376 number of identified “IG loci” that were actually the result of ILS. Accordingly,  $3 \times DIP$  applies a  
377 correction for ILS that is proportional to the frequency of these ALT loci. We found that  $3 \times DIP$   
378 reduces directional bias at short branch lengths (Fig. 6C, F, and I; Fig. 6) and does not provide

379 false positive results in the complete absence of IG (Fig. S3). These results indicate that  $3\times DIP$  is  
380 a step toward overcoming directional bias; however, bias persisted for the shortest branch length  
381 simulations, meaning that there are biological scenarios in which  $3\times DIP$  is not free from bias.

382 Fully overcoming bias introduced into IG analyses by assignment error represents a  
383 future goal for the field. With current implementations of *DIP*, inferences of IG in the  $P3\Rightarrow P2$   
384 direction should be viewed with caution, especially in taxa with very recent divergence times. On  
385 the other hand, it can be viewed as a conservative test for  $P2\Rightarrow P3$  IG, so identification of IG in  
386 that direction can be interpreted as a much more confident prediction. As suggested above,  
387 further progress in this area may come through more complex models that explicitly include ILS  
388 (Hibbins and Hahn, In Review).

389 There are also unexplored factors that should be considered when implementing *DIP*  
390 because our simulations were run under simplifying assumptions such as random mating,  
391 constant population size, and a single bout of instantaneous IG solely between  $P3$  and  $P2$ .  
392 Violation of these assumptions in natural populations (Eriksson and Manica 2012; Prüfer et al.  
393 2014; Kuhlwilm et al. 2016; Slon et al. 2018) may introduce additional sources of bias, which  
394 should be investigated in future studies with more complex simulation scenarios.

#### 395 396 *DIP performance on empirical data*

397 We chose hominin IG as a test case because it is one of the most famous and best-studied  
398 examples of IG. An additional benefit is that the sampling in the group is dense; several modern  
399 human samples as well as samples from ancient Neanderthal and Denisovan tissues are available.  
400 A benefit of this dense taxon sampling is that previous studies have been able to apply five-taxon  
401 statistics to polarize IG, leading to the conclusion that “all or almost all of the gene flow detected  
402 was from Neandertals into modern humans” (Green et al. 2010). However, more recent analyses  
403 of additional archaic samples from different parts of the hominin geographical range also  
404 indicated IG in the opposite direction (Kuhlwilm et al. 2016) as well as mating between  
405 Neanderthals and Denisovans (Slon et al. 2018).

406 An additional benefit of dense hominin taxon-sampling is that the phylogenetic  
407 placement of samples allows us to analyze the same IG event with four-taxon statistics from two  
408 different angles. We devised a TSS in which Neanderthal and a modern human acted as  $P3$  and  
409  $P2$ , respectively (TSS1, Fig. 8A) as well as one in which the roles were reversed (TSS2, Fig. 8F).  
410 Importantly, these TSSs allowed us to evaluate whether the directional bias described above was

411 strong enough to outweigh the true signature from IG. *DIP* returned contradictory results for  
412 TSS1 and TSS2. In both cases,  $2\times DIP$  and  $3\times DIP$  favored  $P3 \Rightarrow P2$  IG, despite the identity of  $P3$   
413 and  $P2$  being reversed in the two cases. The fact that both analyses sided with the directional bias  
414 we documented above, suggests that bias may be outweighing the IG signature. This is consistent  
415 with the observation that hominin divergence is lower than even our shortest simulated branch  
416 lengths (Fig. S4), suggesting that biasing factors are strong enough to bias even  $3\times DIP$ . It is  
417 worth noting, however, that the magnitude of  $\Delta AK$  and  $\Delta\Delta AK$  from TSS1 is higher than that from  
418 TSS2, meaning the signal favoring Neanderthal  $\Rightarrow$  French IG (the expected direction) is stronger  
419 than the signal in the opposite direction.

420 Our general takeaway from analysis of hominin data is that, like all IG analysis tools,  
421 there are limits to the conditions under which *DIP* can be reliably applied. Although  $3\times DIP$   
422 represents a step in the right direction, in the case of hominin IG, the level of ILS swamps out the  
423 signal of IG. We suggest that incorporating an alternative means of assigning introgressed loci,  
424 such as  $f_d$  (Durand et al. 2011; Martin et al. 2015), may yield more reliable results when ILS is  
425 prevalent, representing an area of future work. For the time being, *DIP* will be most reliable in  
426 cases of IG that occurred at more ancient time scales (Forsythe et al. In Review; Dasmahapatra et  
427 al. 2012; Fontaine et al. 2015).

428

## 429 **METHODS**

### 430 *Resource availability*

431 URLs for downloading previously published data are provided in place in the following sections.  
432 Scripts for reproducing the analyses in this study are available at:

433 <https://github.com/EvanForsythe/DIP>. Also included are *R* scripts for performing *DIP* on  
434 genomic data. All scripts are callable from the command line. Users have the choice of inputting  
435 either whole chromosome alignments, which will be divided into single window (i.e. locus)  
436 alignments in preparation for *DIP*. Alternatively, *DIP* takes single-locus alignments, bypassing  
437 the window partitioning step. *DIP* outputs descriptive statistics and PDF figures similar to Fig. 8.

438

### 439 *Simulations of sequence evolution*

440 We generated whole genome alignments in which IG has occurred in some (but not all)  
441 loci, and in which donor and recipient taxa for each introgressed locus are known. To accomplish  
442 this, we simulated sequence evolution of loci 5000 nucleotides in length in a four-taxon system

443 (three in-group taxa,  $P1$ ,  $P2$ , and  $P3$  and an outgroup,  $O$ ) (Fig. 1). All simulations were  
444 performed with *ms* (Hudson 2002) and *seq-gen* (Rambaut and Grassly 1997) implemented in *R*  
445 v3.5.0 with *phyclust* v0.1-22 (Chen 2011) similar to (Martin et al. 2015). A portion of the loci  
446 were simulated to have evolved along a path of simple speciation. In the absence of ILS, the  
447 gene trees for these loci should match the speciation history,  $((P1,P2)P3)O$  (Fig. 1A). These  
448 loci, denoted as SP loci, were simulated with the following *R* commands:

```
449  
450 ret.msSP<-ms(nsam = 4, nreps = 1, opts = "-T -t 50 -I 4 1 1 1 1 -ej 4 2 1  
451 -ej 8 3 1 -ej 12 4 1 -r 5 5000")  
452  
453 seqsSP<-seqgen(opts = "-mHKY -l5000 -s 0.01", newick.tree = ret.msSP[3])  
454
```

455 Loci with instantaneous unidirectional IG occurring between  $P2$  and  $P3$  (IG loci) were  
456 also simulated. IG trees (transferred in either direction) will have the topology,  $(P3,P2)P1)O$ ,  
457 and thus differ from the species tree. The direction of IG for an individual locus was indicated by  
458 ‘donor taxon’ and ‘recipient taxon’ as in the following *R* command:

```
459  
460 ret.msIG <- ms(nsam = 4, nreps = 1, opts= "-T -t 50 -I 4 1 1 1 1 -ej 4 2  
461 1 -ej 8 3 1 -ej 12 4 1 -es 2 <recipient taxon> 0.4 -ej 2 5 <donor taxon>  
462 -r 5 5000")  
463  
464 seqsIG<-seqgen(opts = "-mHKY -l5000 -s 0.01", newick.tree = ret.msIG[3])  
465
```

466 We replicated the above commands for SP and IG loci to create datasets representing simulated  
467 ‘whole-genome alignments’ composed of a total of 5000 loci (Fig. S1). We define the proportion  
468 of all loci in the genome resulting from simulated IG in either direction as  $pIG$  and the  
469 proportion of introgressed genes that were transferred in the  $P3 \Rightarrow P2$  direction as  $p(P3 \Rightarrow P2)$ .  
470 Since a single locus can only be transferred in one direction or the other, the proportion of loci  
471 transferred in the  $P2 \Rightarrow P3$  direction,  $p(P2 \Rightarrow P3)$ , is  $1 - p(P3 \Rightarrow P2)$ . Whole genome alignments with  
472 known values of  $p(IG)$  and  $p(P3 \Rightarrow P2)$  were used to test the performance of *DIP*. We performed  
473 parameter scans by simulating genome alignments with varying combinations of  $p(IG)$  and  
474  $p(P2 \Rightarrow P3)$  (See Fig. S1).

475 The default branch length parameters used for Fig. 3 and Fig. 5 are  $T_{IG}=1$ ,  $T_{\alpha}=4$ ,  $T_{\beta}=8$ ,  
476 and  $T_{\gamma}=12$  measured in coalescent units of  $4N$  generations (see Fig. 1). To explore the effects of



477 divergence times, we multiplied all branch length parameters by a range of different SF values.  
478 For example, SF=0.1 results in the following node depths:  $T_{IG}=0.1$ ,  $T_{\alpha}=0.4$ ,  $T_{\beta}=0.8$ , and  $T_{\gamma}=1.2$ .  
479 For parameter scans involving branch lengths, we generated point estimates of  $\Delta K$  and  $\Delta\Delta K$   
480 from ten replicate genomes for each condition.

481

#### 482 *Assignment of SP and IG loci*

483 The first step in all versions of *DIP* is sorting loci to isolate the loci that were  
484 introgressed and those that follow the species branching order (i.e. topology assignment). Using  
485 simulated data affords us omniscience at this step (i.e. we know whether each locus was  
486 originally simulated as introgressed or not). However, unless specifically stated, we did not make  
487 use of the known history of simulated loci. Instead, *DIP* infers the IG status of loci based on the  
488 topology of a neighbor joining gene tree inferred for each locus using *Ape* v5.2 (Paradis et al.  
489 2004). Loci displaying the  $((P1,P2)P3)O$  topology are marked as speciation loci (SP loci). Loci  
490 displaying the  $((P2,P3)P1)O$  topology are designated as introgressed loci (IG loci). Any loci  
491 displaying the alternative topology,  $((P1,P3)P2)O$ , which are not produced by speciation or IG,  
492 are omitted from  $1\times DIP$  and  $2\times DIP$  but used by  $3\times DIP$  to calculate a correction factor (see  
493 below).

494

#### 495 *Inferring IG directionality with $1\times DIP$*

496 We calculated the pairwise divergences,  $K_{23}$ ,  $K_{12}$ , and  $K_{13}$  (as indicated in Fig. 1A) for  
497 each IG and SP locus using the *dist.dna* command from the *Ape* package with default settings.  
498 Pairwise divergences,  $K_{23}$ ,  $K_{12}$ , and  $K_{13}$  are named for the taxa involved in the distance  
499 calculation. For example,  $K_{23}$  measures the divergence of  $P2$  and  $P3$  (see Fig. 1).  $\Delta K_{23}$ ,  $\Delta K_{12}$ , and  
500  $\Delta K_{13}$  were calculated based on difference in mean  $K$  values between SP and IG loci as shown in  
501 *Eqs. 1-3*. To test for significance, bootstrapped distributions were obtained by resampling (with  
502 replacement) loci from the genome to achieve genome alignments equal in number of loci to the  
503 original genome alignment. 1000 such replicates were performed, recalculating  $\Delta K_{23}$ ,  $\Delta K_{12}$ , and  
504  $\Delta K_{13}$  for each replicate.  $P$ -values for the significance of  $\Delta K$  values were calculated as the  
505 proportion of replicates for which  $\Delta K \leq 0$ .

506

#### 507 *Inferring IG directionality with $2\times DIP$ and $3\times DIP$*

508  $\Delta\Delta K$  was calculated from  $\Delta K_{12}$ , and  $\Delta K_{13}$  described in Eq. 3. The bootstrap resampling scheme  
509 described in the previous paragraph was used to assess the significance of  $2\times DIP$ .  $\Delta\Delta K$  was  
510 calculated for each replicate and  $p$ -values were obtained from the proportion of replicates for  
511 which  $\Delta\Delta K$  overlapped zero (multiplied by two for a two-sided test). Like  $2\times DIP$ ,  $3\times DIP$  makes  
512 use of  $\Delta\Delta K$  to indicate the directionality of IG. However,  $3\times DIP$  also introduces  $\Delta\Delta K_{alt}$ , which is  
513 calculated according to Eq. 5.  $\Delta\Delta\Delta K$  is obtained from the difference between  $\Delta\Delta K$  and  $\Delta\Delta K_{alt}$   
514 (see Eq. 6). As for  $\Delta\Delta K$  above, significance of  $\Delta\Delta\Delta K$  is obtained from resampled whole genomes  
515 alignments.

516

### 517 *Hominin data analysis*

518 To generate whole-chromosome alignments from the hominin dataset for *DIP*, genome  
519 resequencing data for two Neanderthal, one Denisovan, and two modern human samples from  
520 (Prüfer et al. 2014) were downloaded from <http://cdna.eva.mpg.de/neandertal/>. VCF files were  
521 downloaded for chromosome 1 for each species. The human reference genome (hg19)  
522 (International Human Genome Sequencing Consortium 2001), which was originally used for  
523 read mapping during the creation of VCF files, was obtained from  
524 <http://hgdownload.cse.ucsc.edu/goldenPath/hg19/>. The following procedures were performed for  
525 each sample.

526 Structural variation (indel) information was trimmed from VCF files, using *VCFtools*  
527 (Danecek et al. 2011) and *Tabix* (Li et al. 2009) with the following commands:

528

```
529 vcfutils --gzvcf Chrom1_with_indels.vcf.gz --remove-indels --recode --  
530 recode-INFO-all --out Chrom1_SNPs_only.vcf
```

531

```
532 bgzip Chrom1_SNPs_only.vcf
```

533

```
534 tabix -p vcf Chrom1_SNPs_only.vcf.gz
```

535

536 Whole-chromosome consensus sequence was extracted from VCF files using *BCFtools*  
537 (Li et al. 2009) with the command below. For heterozygous sites, by default *bcftools consensus*  
538 applies the alternative variant (i.e. the variant that does not match the reference genome) to the  
539 consensus sequence for the given sample (see <https://samtools.github.io/bcftools/bcftools.html>).

540

541 cat hg19\_chrom1.fa | bcftools consensus Chrom1\_SNPs\_only.vcf.gz >  
542 Chrom\_1\_consensus.fa

543  
544 We used the reference chimpanzee genome (PanTro5) (The Chimpanzee Sequencing  
545 Consortium 2005) as an outgroup. We downloaded a MAF alignment of chromosome one from  
546 PanTro5 and hg19 from: <http://hgdownload.cse.ucsc.edu/goldenpath/hg19/vsPanTro5/axtNet/>.  
547 We converted this file to a FASTA file using Galaxy tools (Afgan et al. 2018) available at  
548 <https://usegalaxy.org/>. Finally, the consensus sequence from each hominin samples and  
549 chimpanzee was concatenated into a whole-chromosome multiple sequence alignment in FASTA  
550 format. This five-taxon alignment was pruned to contain four taxa according to each TSS (see  
551 Fig. 8) and then used as input to *DIP*.

552

## 553 ACKNOWLEDGMENTS

554 This work was funded by NSF grant MCB-1733227 to D.B.S. as well as NSF grant IOS-  
555 1444490 to M.A.B. We thank M.J. Sanderson, R.A. Moshier, A.D.L Nelson, K. Dew-Budd, K.  
556 Palos, A.E. Baniaga, and S.M. Lambert for helpful discussion.

557

## 558 FIGURE LEGENDS

### 559 Fig. 1. Expected divergence under simulated introgression

560 The species *P1*, *P2*, *P3*, and *O* were used for simulation analyses. (A) The species branching order  
561 (SP). IG between species *P2* and *P3* is indicated with a double-sided dotted arrow. Default values  
562 used during all simulations, unless specified otherwise, are:  $T_{IG}=1$ ,  $T_\alpha=4$ ,  $T_\beta=8$ , and  $T_\gamma=12$  in  
563 coalescent units ( $4N$  generations) (Hudson 2002). (B) A gene tree depicting a gene that was  
564 introgressed  $P3 \Rightarrow P2$ . (C) A gene tree depicting a gene that was introgressed  $P2 \Rightarrow P3$ .  $\Delta K$  values  
565 are calculated based on changes in mean divergence between pairs of taxa in the set of SP trees vs.  
566 the set of IG trees (see Eq. 1-3). Note that the expected profiles of  $\Delta K$  values for  $P3 \Rightarrow P2$  IG differs  
567 from that of  $P2 \Rightarrow P3$  IG, forming the basis for the *DIP* test (see Main Text and Fig. 2).

568

### 569 Fig. 2. Workflow of the *DIP* test.

570 Point estimates of  $\Delta K_{23}$ ,  $\Delta K_{12}$ ,  $\Delta K_{13}$  are calculated from whole genomes, which are then  
571 resampled to yield distributions of  $\Delta K_{23}$ ,  $\Delta K_{12}$ ,  $\Delta K_{13}$ . Unidirectional  $P3 \Rightarrow P2$  IG is indicated by  
572 the profile,  $\Delta K_{23} > 0$ ,  $\Delta K_{12} > 0$ , and  $\Delta K_{13} = 0$ . Unidirectional  $P2 \Rightarrow P3$  IG is indicated by  $\Delta K_{23} > 0$ ,  
573  $\Delta K_{12} = 0$ , and  $\Delta K_{13} > 0$ . Bidirectional IG is indicated by  $\Delta K_{23} > 0$ ,  $\Delta K_{12} > 0$ , and  $\Delta K_{13} > 0$ . All  
574 other profiles are considered inconclusive regarding the occurrence and directionality of IG. *P*-  
575 values for testing whether each  $\Delta K$  value significantly differs from 0 are obtained from the  
576 proportion of replicates for which  $\Delta K \leq 0$ . Colors reflect the black, red, and gray genealogical  
577 histories from Fig. 1. In this illustration, all IG loci are in the  $P3 \Rightarrow P2$  (red) direction. But we use

578 the red/gray dashed lines for showing the distribution of IG loci because, in general, the set of IG  
579 loci can contain  $P3 \Rightarrow P2$  loci,  $P2 \Rightarrow P3$  loci, or both.

580

### 581 **Fig. 3. DIP analysis of simulated introgression.**

582 Genomes were simulated according to steps 1-3 in Fig. S1, under unidirectional  $P2 \Rightarrow P3$  IG (**A**),  
583 symmetrical bidirectional  $P3 \Leftrightarrow P2$  IG (**B**), and unidirectional  $P3 \Rightarrow P2$  IG (**C**). Simulation  
584 parameters are as follows: (**A**),  $n = 5000$ ,  $pIG = 0.5$ ,  $p(P3 \Rightarrow P2) = 0$ ; (**B**),  $n = 5000$ ,  $pIG = 0.5$ ,  
585  $p(P3 \Rightarrow P2) = 0.5$ ; (**C**),  $n = 5000$ ,  $pIG = 0.5$ ,  $p(P3 \Rightarrow P2) = 1$ . DIP was applied to each genome to  
586 yield profiles of  $\Delta K_{23}$ ,  $\Delta K_{12}$ ,  $\Delta K_{13}$ . \*\* indicates significant departure from 0 ( $p < 0.01$ ). (**D**) A  
587 plot scanning simulation parameters, proportion of the genome that was introgressed ( $pIG$ ) (y-  
588 axes) and proportion of introgressed loci transferred in each direction ( $p(P3 \Rightarrow P2)$ ) (x-axis). Each  
589 square in the plot indicates the DIP results obtained from five replicated simulated genome  
590 alignments. Red boxes indicate the profile consistent with  $P3 \Rightarrow P2$  IG (see panel C). Gray boxes  
591 indicate the profile consistent with  $P2 \Rightarrow P3$  IG (see panel A). The shading of the boxes  
592 corresponds the number of replicates (out of five) that indicate a given profile, as specified by  
593 the key to the right of the plot. Unshaded boxes indicate all five replicates yield the bidirectional  
594 IG profile (see panel B).

595

### 596 **Fig. 4. Workflow of the $2 \times$ DIP test.**

597 (**Top**) A point estimate of  $\Delta \Delta K$  is calculated from a whole genome alignment from  $\Delta K_{12}$  and  
598  $\Delta K_{13}$  values. (**Bottom**) A sampling distribution of  $\Delta \Delta K$  is calculated from resampled gene  
599 alignments (bootstrapping) obtained from the original genome. If the majority of  $\Delta \Delta K$   
600 replicates are  $> 0$ , it is an indication of asymmetric  $P3 \Rightarrow P2$  IG. In this case, the proportion of  $\Delta \Delta K$   
601 replicates  $< 0$  determines the  $p$ -value (doubled for a two-sided test) for asymmetric  $P3 \Rightarrow P2$  IG.  
602 Asymmetric  $P2 \Rightarrow P3$  IG is indicated by the opposite pattern.

603

### 604 **Fig. 5. $2 \times$ DIP analysis of simulated introgression.**

605 Genomes were simulated according to steps 1-3 in Fig. S1. Genomes were simulated under  
606 unidirectional  $P2 \Rightarrow P3$  IG (**A**), symmetrical bidirectional  $P3 \Leftrightarrow P2$  IG (**B**), and unidirectional  
607  $P3 \Rightarrow P2$  IG (**C**). Simulation parameters are as follows: (**A**),  $n = 5000$ ,  $pIG = 0.5$ ,  $p(P3 \Rightarrow P2) = 0$ ;  
608 (**B**),  $n = 5000$ ,  $pIG = 0.5$ ,  $p(P3 \Rightarrow P2) = 0.5$ ; (**C**),  $n = 5000$ ,  $pIG = 0.5$ ,  $p(P3 \Rightarrow P2) = 1$ .  $2 \times$ DIP was  
609 applied to each genome to yield a sampling distribution of  $\Delta \Delta K$ . \*\* indicates significant  
610 departure from 0 ( $p < 0.01$ ). (**D**) A plot scanning  $pIG$  and  $p(P3 \Rightarrow P2)$  as in Fig. 3D. Red boxes  
611 indicate significant ( $p < 0.05$ )  $P3 \Rightarrow P2$   $2 \times$ DIP signature (see panel C). Gray boxes indicate  
612 significant ( $p < 0.05$ )  $P2 \Rightarrow P3$   $2 \times$ DIP signature (see panel A). The shading of the boxes  
613 corresponds the number of replicates (out of five) that significantly indicate the signature, as  
614 specified by the key to the right of the plot. Unshaded boxes indicate all five replicates failed to  
615 reject symmetrical IG (see panel B).

616

### 617 **Fig. 6. Exploration of branch length parameters used during genome simulation.**

618 The default branch lengths used during all previous simulations ( $T_{IG}=1$ ,  $T_{\alpha}=4$ ,  $T_{\beta}=8$ , and  $T_{\gamma}=12$ )  
619 were multiplied by branch-length scaling factors. For all plots, 10 replicate genomes were  
620 simulated for each scaling factor value.  $pIG = 0.5$  was used for all simulations. DIP was  
621 performed on each replicate; individual points on plots represent point estimates of  $\Delta \Delta K$  and  
622  $\Delta \Delta \Delta K$  (jittered for clarity). Genomes were simulated with asymmetric IG favoring  $P3 \Rightarrow P2$  (**A**-  
623 **C**), symmetric bidirectional IG (**D-F**), and asymmetric IG favoring  $P2 \Rightarrow P3$  (**G-I**). Omniscient

624  $2\times DIP$  (**A, D, and G**), standard  $2\times DIP$  (**B, E, and H**), and  $3\times DIP$  (**C, F, and I**) were performed.  
625  $\Delta\Delta K$  data points are absent at higher scaling factors because this adjusted version of  $\Delta\Delta K$  can  
626 only be calculated when there are at least some loci with the unexpected topology (ALT loci) as  
627 a result of topology mis-assignment or ILS.

628

629 **Fig. 7. Characterization of  $DIP$  bias under short branch conditions.**

630 Genomes were simulated with different values of  $p(P3 \Rightarrow P2)$  (x axis) and different branch length  
631 scaling factors (SF) (point colors). See Fig. 6 for description of SF. Purple, SF = 0.1; Orange, SF  
632 = 0.2; Green, SF = 0.3. As in Fig. 6, Omniscient  $2\times DIP$  (**A**), standard  $2\times DIP$  (**B**), and  $3\times DIP$  (**C**)  
633 were performed. Ten replicate genomes were analyzed for each condition.  $pIG = 0.5$  was used  
634 for all simulations.

635

636 **Fig. 8.  $DIP$  analysis of hominin introgression.**  $DIP$  was performed on whole-chromosome  
637 alignments of chromosome 1 using two different taxon sampling schemes (TSS). (**A**) Depiction  
638 of the samples used in TSS1. (**B**) Neighbor-joining gene-tree topologies from individual loci.  
639 (San.,French),Nean.), green; (French, Nean.),San), orange; (San, Nean.),French), purple. (**C-E**)  
640 Results from  $1\times DIP$  (**C**),  $2\times DIP$  (**D**), and  $3\times DIP$  (**E**) applied to TSS1 alignment. (**F**) Depiction  
641 of the sampled used in TSS2. (**G**) Neighbor-joining gene-tree topologies from individual loci.  
642 (Deni.,Nean.),French), green; (Nean.,French),Deni.), orange; (Deni.,French),Nean.), purple. (**H-**  
643 **J**) Results from  $1\times DIP$  (**H**),  $2\times DIP$  (**I**), and  $3\times DIP$  (**J**) applied to TSS2 alignment. \*\* indicates  
644 significant departure from 0 ( $p < 0.01$ ).

645

646  
647  
648  
649

**FIGURES**

**Fig. 1**

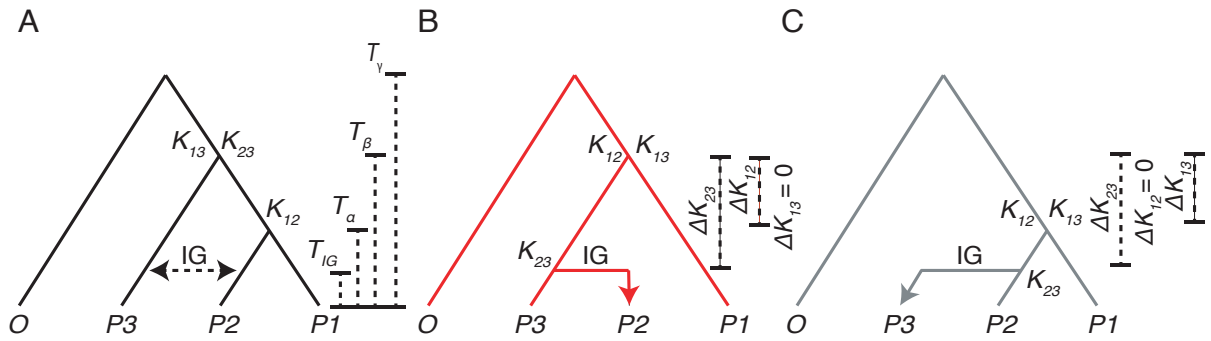

650  
651

652  
653

**Fig. 2**

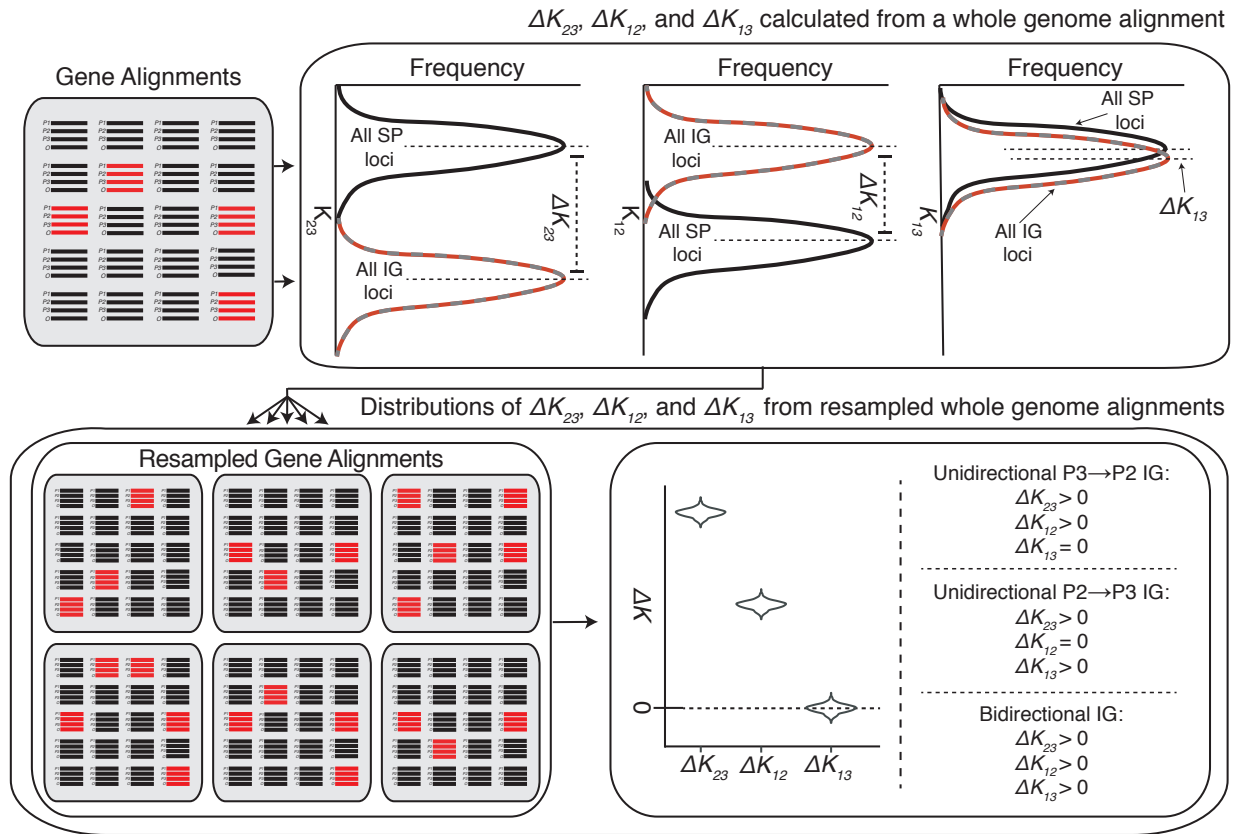

654  
655

656

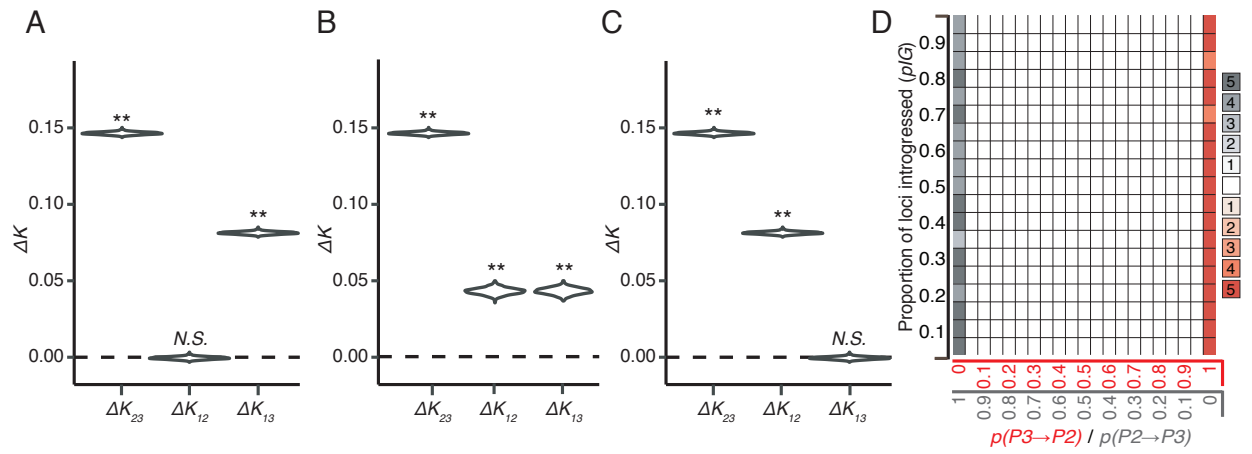

657  
658



659  
660

**Fig. 4**

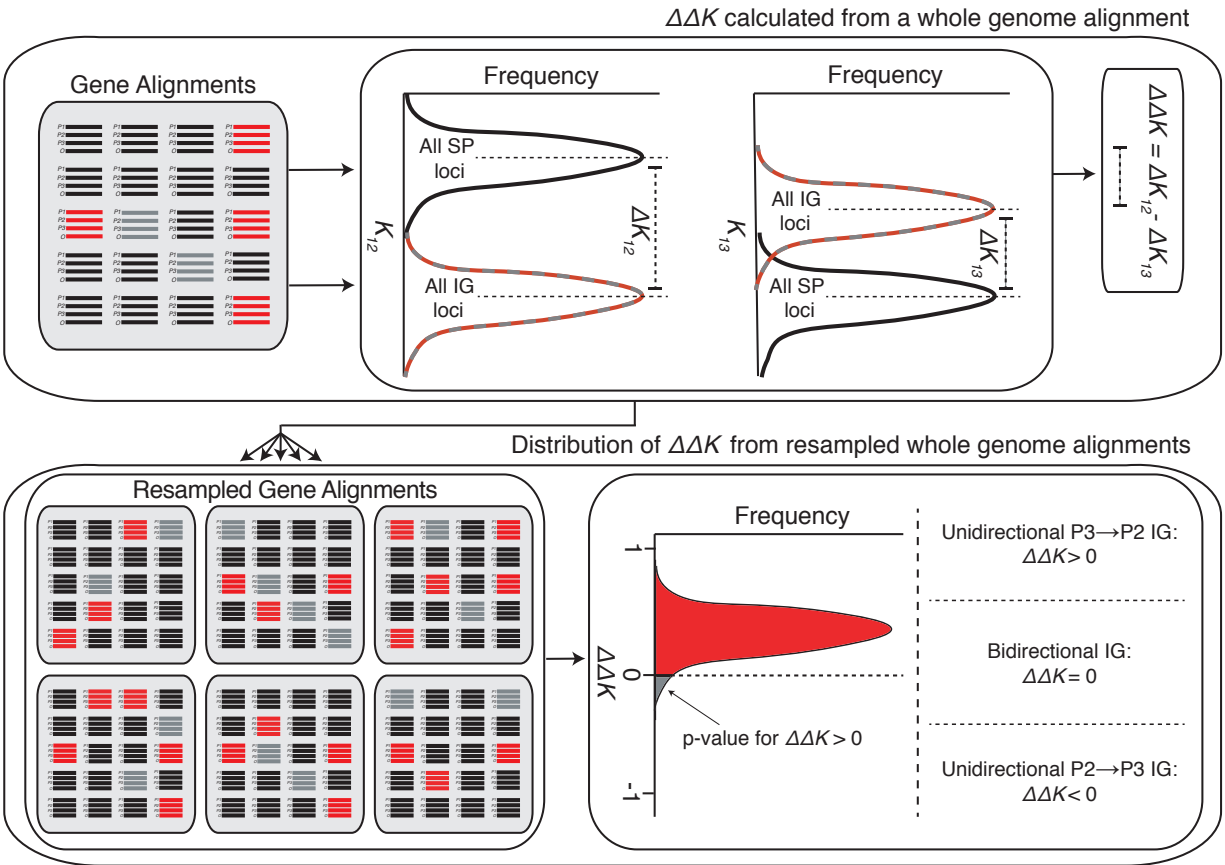

661  
662

663  
664

**Fig. 5**

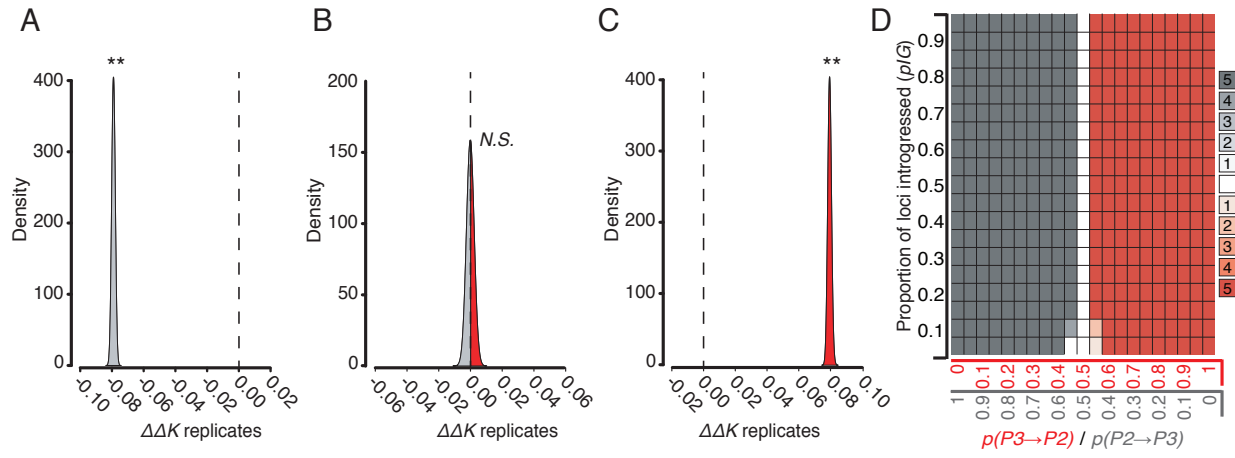

665  
666

667  
668

Fig. 6

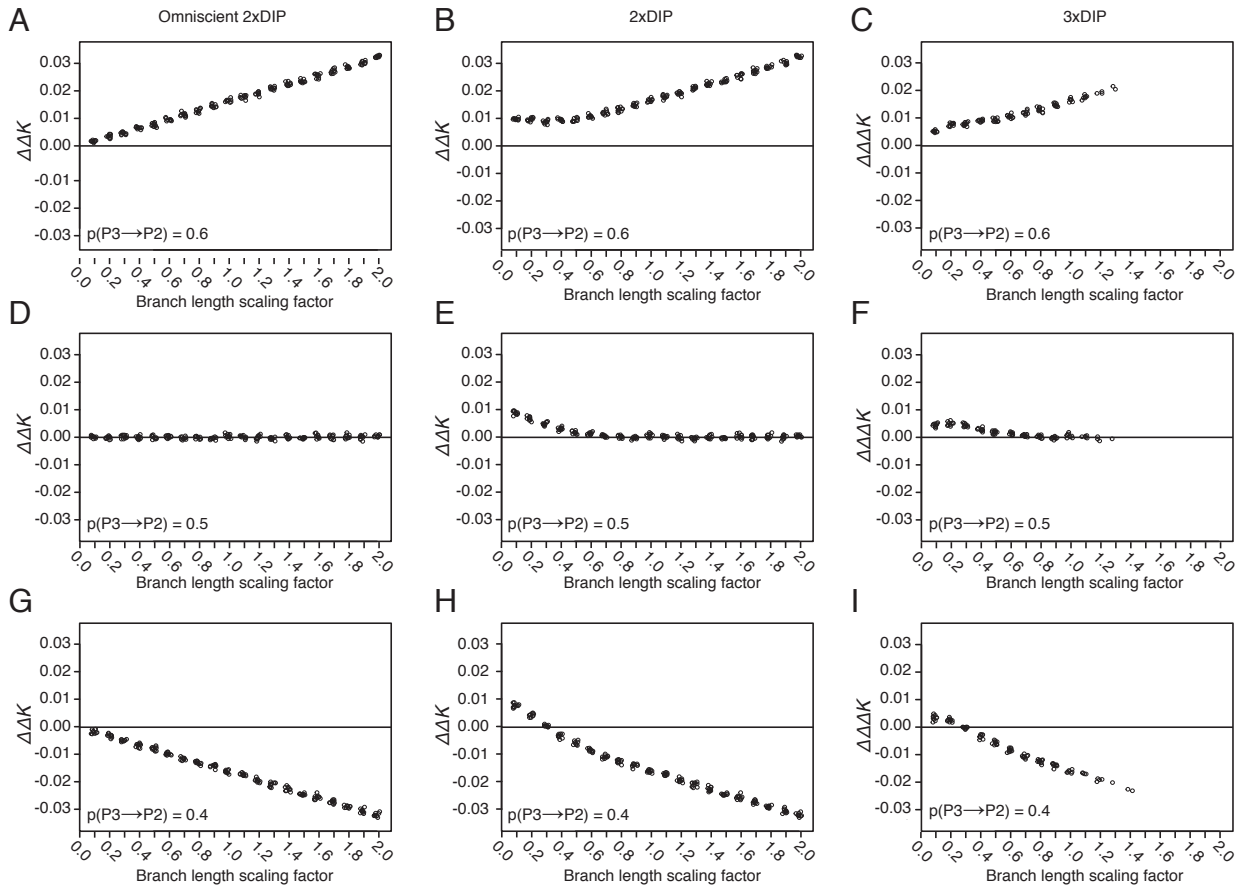

669  
670

671  
672

**Fig. 7**

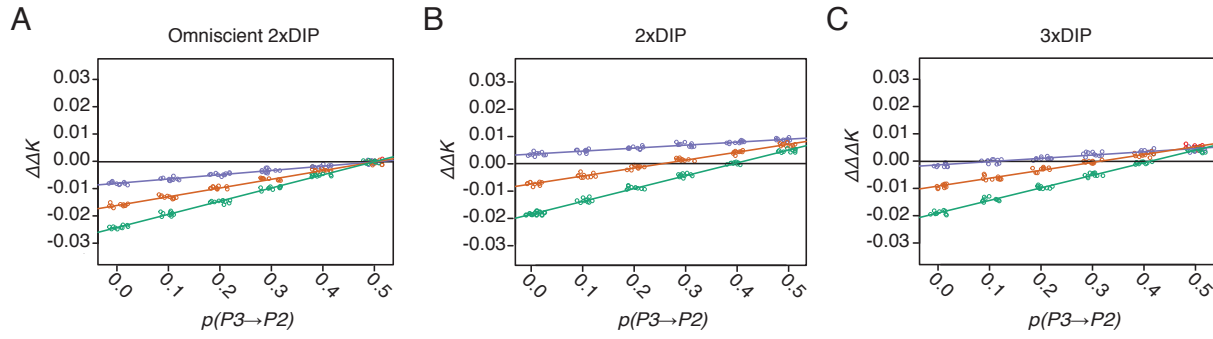

673  
674

675  
676

**Fig. 8**

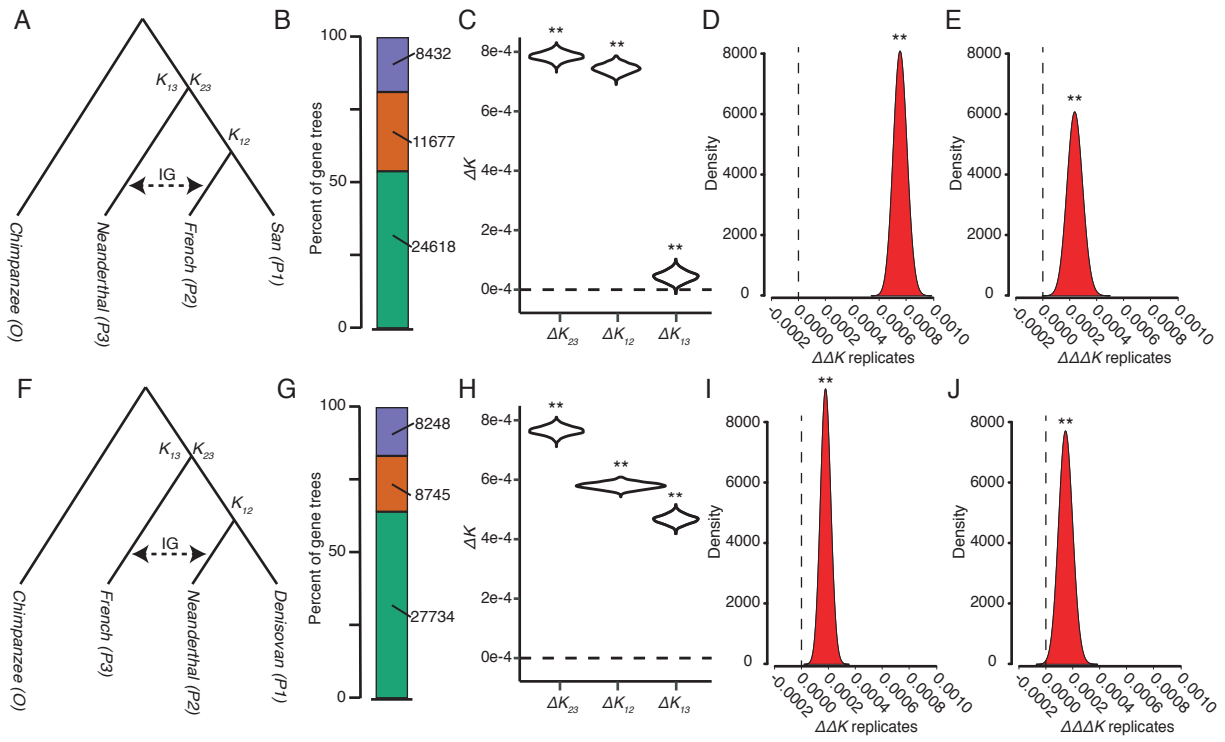

677  
678

679 **CITATIONS**

- 680 Afgan E, Baker D, Beek M Van Den, Bouvier D, Chilton J, Clements D, Coraor N, Guerler A,  
681 Hillman-jackson J, Hiltmann S, et al. 2018. The Galaxy platform for accessible ,  
682 reproducible and collaborative biomedical analyses : 2018 update. 46:537–544.
- 683 Barton NH, Hewitt GM. 1985. Analysis of hybrid zones. *Annu. Rev. Ecol. Syst.* 16:113–148.
- 684 Chen W-C. 2011. Overlapping Codon model, Phylogenetic Clustering, and Alternative Partial  
685 Expectation Conditional Maximization Algorithm. Ph.D. Diss., Iowa Stat Univ.
- 686 Currat M, Ruedi M, Petit RJ, Excoffier L. 2008. The hidden side of invasions: Massive  
687 introgression by local genes. *Evolution (N. Y.)*. 62:1908–1920.
- 688 Danecek P, Auton A, Abecasis G, Albers CA, Banks E, DePristo MA, Handsaker RE, Lunter G,  
689 Marth GT, Sherry ST, et al. 2011. The variant call format and VCFtools. *Bioinformatics*  
690 27:2156–2158.
- 691 Dannemann M, Andrés AM, Kelso J. 2016. Introgression of Neandertal- and Denisovan-like  
692 Haplotypes Contributes to Adaptive Variation in Human Toll-like Receptors. *Am. J. Hum.*  
693 *Genet.* 98:22–33.
- 694 Dasmahapatra KK, Walters JR, Briscoe AD, Davey JW, Whibley A, Nadeau NJ, Zimin A V.,  
695 Hughes DST, Ferguson LC, Martin SH, et al. 2012. Butterfly genome reveals promiscuous  
696 exchange of mimicry adaptations among species. *Nature* 487:94–98.
- 697 Degnan JH, Rosenberg N a. 2009. Gene tree discordance, phylogenetic inference and the  
698 multispecies coalescent. *Trends Ecol. Evol.* 24:332–340.
- 699 Degnan JH, Rosenberg NA. 2013. Discordance of species trees with their most likely gene trees:  
700 A unifying principle. *Mol. Biol. Evol.* 30:2709–2713.
- 701 Durand EY, Patterson N, Reich D, Slatkin M. 2011. Testing for Ancient Admixture between  
702 Closely Related Populations. *Mol. Biol. Evol.* 28:2239–2252.
- 703 Eriksson A, Manica A. 2012. Effect of ancient population structure on the degree of  
704 polymorphism shared between modern human populations and ancient hominins. *Proc.*  
705 *Natl. Acad. Sci.* 109:13956–13960.
- 706 Figueiró H V, Li G, Trindade FJ, Assis J, Pais F, Fernandes G, Santos SHD, Hughes GM,  
707 Komissarov A, Antunes A, et al. 2017. Genome-wide signatures of complex introgression  
708 and adaptive evolution in the big cats. *Sci. Adv.*:1–14.
- 709 Fontaine MC, Pease JB, Steele A, Waterhouse RM, Neafsey DE, Sharakhov I V., Jiang X, Hall  
710 AB, Catteruccia F, Kakani E, et al. 2015. Extensive introgression in a malaria vector species  
711 complex revealed by phylogenomics. *Science* 347:1258522–1258522.
- 712 Forsythe ES, Nelson AD, Beilstein MA. Biased gene retention in the face of massive nuclear  
713 introgression obscures species relationships. In Review. Available from:  
714 <https://www.biorxiv.org/content/early/2018/10/18/197087?%3Fcollection=>
- 715 Green RE, Krause J, Briggs AW, Maricic T, Stenzel U, Kircher M, Patterson N, Li H, Zhai W,  
716 Fritz MH-Y, et al. 2010. A Draft Sequence of the Neandertal Genome. *Science (80-. )*.  
717 328:710–722.
- 718 Hibbins MS, Hahn MW. The timing and direction of introgression under the multispecies  
719 network coalescent. In Review. Available from:  
720 <https://www.biorxiv.org/content/10.1101/328575v2>
- 721 Hudson R. 2002. Ms a Program for Generating Samples Under Neutral Models. *Bioinformatics*  
722 337–338.
- 723 Huson DH, Kl T, Lockhart PJ, Steel M a, Klopper T, Lockhart PJ, Steel M a, Kl T, Lockhart PJ,  
724 Steel M a. 2005. Reconstruction of Reticulate Networks from Gene Trees. *Res. Comput.*  
725 *Mol. Biol. Proc.* 3500:233–249.

- 726 International Human Genome Sequencing Consortium. 2001. Initial sequencing and analysis of  
727 the human genome. 409.
- 728 Kuhlwilm M, Gronau I, Hubisz MJ, De Filippo C, Prado-Martinez J, Kircher M, Fu Q, Burbano  
729 HA, Lalueza-Fox C, De La Rasilla M, et al. 2001. (SI) Ancient gene flow from early  
730 modern humans into Eastern Neanderthals. *Nature* 61:5985–5991.
- 731 Kuhlwilm M, Gronau I, Hubisz MJ, De Filippo C, Prado-Martinez J, Kircher M, Fu Q, Burbano  
732 HA, Lalueza-Fox C, De La Rasilla M, et al. 2016. Ancient gene flow from early modern  
733 humans into Eastern Neanderthals. *Nature* 530:429–433.
- 734 Li H, Handsaker B, Wysoker A, Fennell T, Ruan J, Homer N, Marth G, Abecasis G, Durbin R.  
735 2009. The Sequence Alignment/Map format and SAMtools. *Bioinformatics* 25:2078–2079.
- 736 Maddison WP, Knowles LL. 2006. Inferring Phylogeny Despite Incomplete Lineage Sorting.  
737 *Syst. Biol.* 55:21–30.
- 738 Mallet J, Besansky N, Hahn MW. 2016. How reticulated are species? *BioEssays* 38:140–149.
- 739 Martin SH, Davey JW, Jiggins CD. 2015. Evaluating the use of ABBA-BABA statistics to locate  
740 introgressed loci. *Mol. Biol. Evol.* 32:244–257.
- 741 Orive ME, Barton NH. 2002. Associations between cytoplasmic and nuclear loci in hybridizing  
742 populations. *Genetics* 162:1469–1485.
- 743 Paradis E, Claude J, Strimmer K. 2004. APE: Analyses of phylogenetics and evolution in R  
744 language. *Bioinformatics* 20:289–290.
- 745 Pease JB, Hahn MW. 2015. Detection and Polarization of Introgression in a Five-Taxon  
746 Phylogeny. *Syst. Biol.* 64:651–662.
- 747 Prüfer K, Racimo F, Patterson N, Jay F, Sankararaman S, Sawyer S, Heinze A, Renaud G,  
748 Sudmant PH, De Filippo C, et al. 2014. The complete genome sequence of a Neanderthal  
749 from the Altai Mountains. *Nature* 505:43–49.
- 750 Rambaut A, Grassly NC. 1997. Seq-Gen: an application for the Monte Carlo simulation of DNA  
751 sequence evolution along phylogenetic trees. *Cabios* 13:235–238.
- 752 Rieseberg LH, Soltis DE. 1991. Phylogenetic consequences of cytoplasmic gene flow in plants.  
753 *Evol. trends Plants* 5:65–84.
- 754 Rieseberg LH, Whitton J, Linder CR. 1996. Molecular marker incongruence in plant hybrid  
755 zones and phylogenetic trees. *Acta Bot. Neerl.* 45:243–262.
- 756 Rosenzweig BK, Pease JB, Besansky NJ, Hahn MW. 2016. Powerful methods for detecting  
757 introgressed regions from population genomic data. *Mol. Ecol.*:2387–2397.
- 758 Schrider D, Ayroles J, Matute DR, Kern AD. 2018. Supervised machine learning reveals  
759 introgressed loci in the genomes of *Drosophila simulans* and *D. sechellia*. *PLoS Genet.*  
760 17:0670.
- 761 Slon V, Mafessoni F, Vernot B, de Filippo C, Grote S, Viola B, Hajdinjak M, Peyrégne S, Nagel  
762 S, Brown S, et al. 2018. The genome of the offspring of a Neanderthal mother and a  
763 Denisovan father. *Nature*.
- 764 Soltis DE, Soltis PS. 2003. The role of phylogenetics in comparative genetics. *Plant Physiol.*  
765 132:1790–1800.
- 766 Stebbins GL. 1968. The Significance of Hybridization for Plant Taxonomy and Evolution. *Taxon*  
767 18:26–35.
- 768 Stenz NWM, Larget B, Baum DA, Ané C. 2015. Exploring tree-like and non-tree-like patterns  
769 using genome sequences: An example using the inbreeding plant species *Arabidopsis*  
770 *thaliana* (L.) *heynh.* *Syst. Biol.* 64:809–823.
- 771 Suarez-Gonzalez A, Hefer CA, Christe C, Corea O, Lexer C, Cronk QCB, Douglas CJ. 2016.  
772 Genomic and functional approaches reveal a case of adaptive introgression from *Populus*  
773 *balsamifera* (balsam poplar) in *P. trichocarpa* (black cottonwood). *Mol. Ecol.* 25:2427–2442.

- 774 Than C, Ruths D, Nakhleh L. 2008. PhyloNet: a software package for analyzing and  
775 reconstructing reticulate evolutionary relationships. *BMC Bioinformatics* 9:322.  
776 The Chimpanzee Sequencing Consortium. 2005. Initial sequence of the chimpanzee genome and  
777 comparison with the human genome. 437.  
778 Whitney KD, Randell R a, Rieseberg LH. 2006. Adaptive introgression of herbivore resistance  
779 traits in the weedy sunflower *Helianthus annuus*. *Am. Nat.* 167:794–807.  
780 Yakimowski SB, Rieseberg LH. 2014. The role of homoploid hybridization in evolution: A  
781 century of studies synthesizing genetics and ecology. *Am. J. Bot.* 101:1247–1258.  
782 Zheng Y, Janke A. 2018. Gene flow analysis method, the D-statistic, is robust in a wide  
783 parameter space. *BMC Bioinformatics* 19:1–19.  
784



785 SUPPLEMENTAL INFORMATION  
786

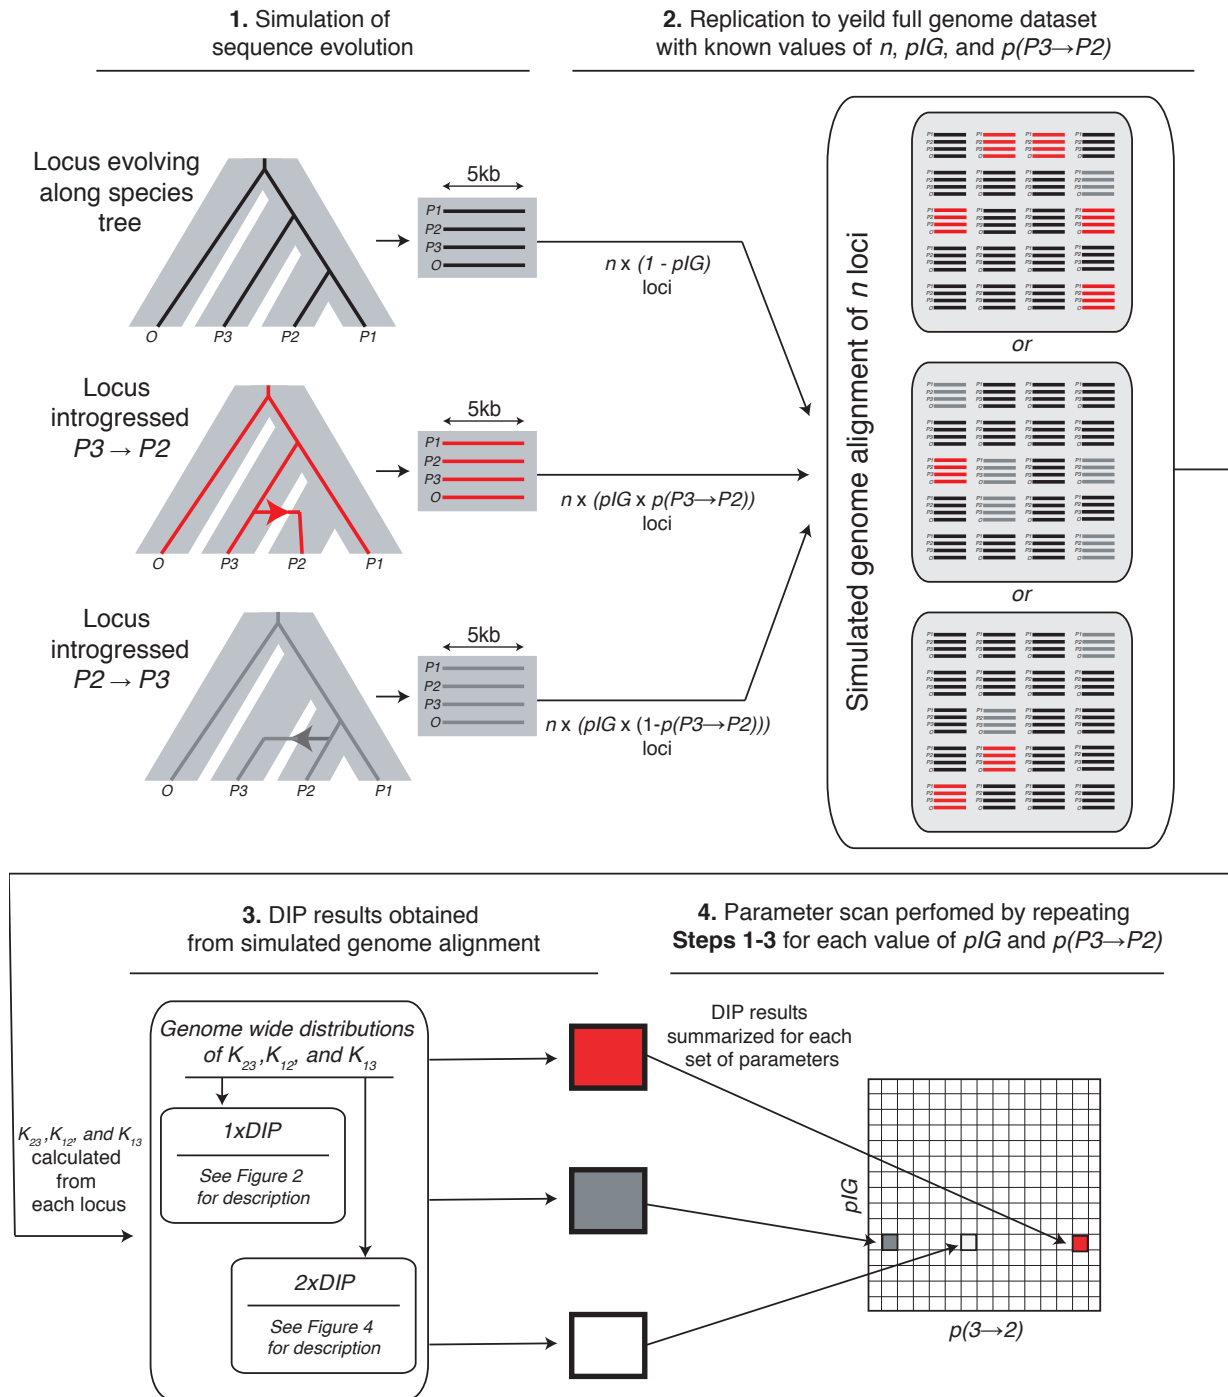

787  
788 **Fig. S1. Schematic of the workflow used to simulate IG across a genome and perform DIP.**  
789 **(1)** Each locus is evolved along the species tree or along a path of IG and used to generate a 5kb  
790 alignment using *ms* and *seq-gen* similar to (Martin et al. 2015). **(2)** Step 1 was repeated to yield a  
791 full genome of  $n=5000$  loci in which  $n \times p(IG)$  loci were introgressed and the remaining loci  
792 evolved along the species tree. For example, a genome in which half of all genes were not  
793 transferred while the other half were transferred  $P3 \Rightarrow P2$  would be generated with:  $n=5000$ ,  $pIG$

794 = 0.5,  $p(P3 \Rightarrow P2) = 1.0$ . **(3)** Different steps in the *DIP* pipeline are performed on the simulated  
795 genome. **(4)** Steps 1-3 are repeated for each combination of *pIG* and  $p(P3 \Rightarrow P2)$ . Each pixel in a  
796 parameter scan graph represents one or more runs of Steps 1-3.

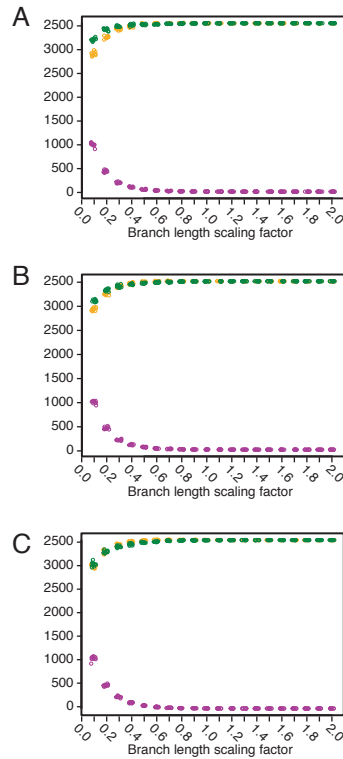

797  
798  
799  
800  
801  
802  
803  
804

**Fig. S2. Gene tree topologies inferred from simulated genomes.** Gene tree counts for genomes simulated with different branch lengths (x-axes) and  $p(P3 \Rightarrow P2)$  values of 0.6 (A), 0.5 (B), and 0.4 (C). Each point represents the number of trees displaying a given topology from a replicate genome.  $((P1, P2), P3)$ , orange;  $((P2, P3), P1)$ , green;  $((P1, P3), P2)$ , purple. These same simulated genomes were analyzed in Fig. 6.

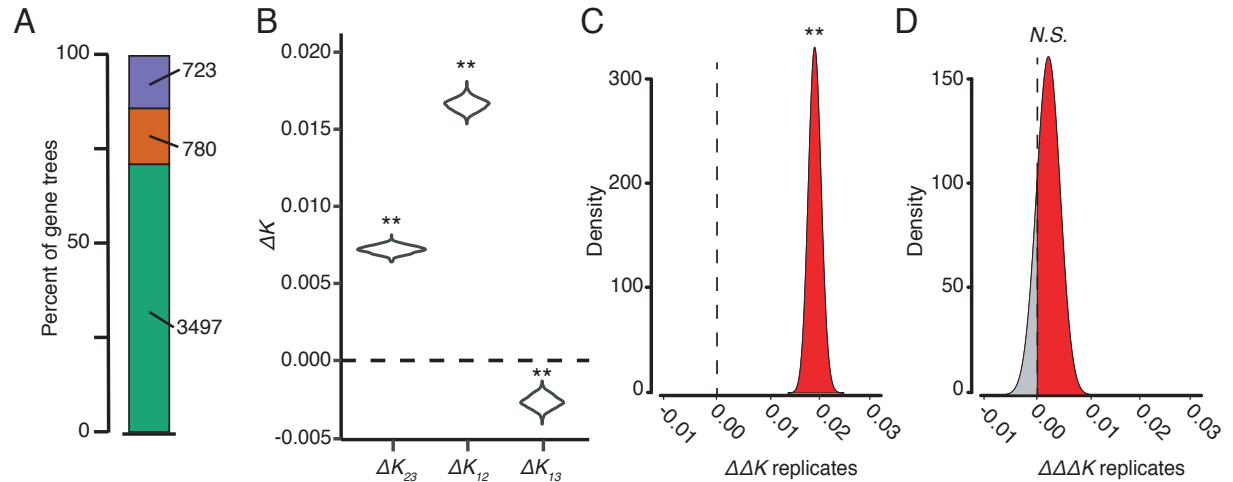

805  
806  
807  
808  
809  
810  
811  
812  
813

**Fig. S3. DIP analysis of a genome with incomplete lineage sorting but no introgression.** A genome alignment was simulated with  $pIG$  set to zero using the scaling factor 0.1 (see Fig. 1 and Fig. 6). Therefore, all loci with topologies that conflict with species tree are the result of ILS and not IG (A) The topologies of neighbor joining trees inferred from 5000 simulated loci.  $((P1,P2),P3)$ , green;  $((P2,P3),P1)$ , orange;  $((P1,P3),P2)$ , purple. (B-D)  $1\times DIP$  (B),  $2\times DIP$  (C) and  $3\times DIP$  (D) analysis of the genome alignment.

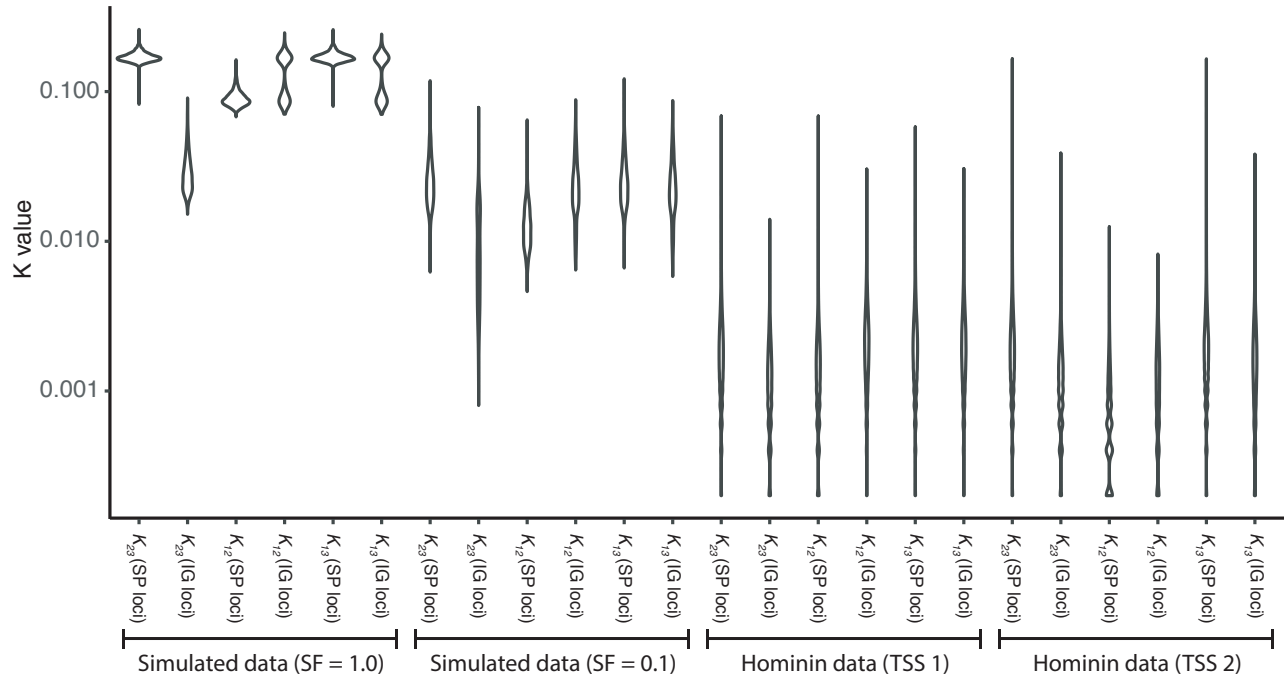

814  
815  
816  
817  
818  
819

**Fig. S4. Sequence divergence measures from simulated and Hominin data.** Violin plot showing distributions of pairwise divergence values for inferred SP and IG loci (see Fig. 1 and 2). Both simulated datasets were simulated with  $p_{IG}=0.5$  and  $p(P3 \Rightarrow P2)=0.5$ .
